# Supplementary material for: Direct synthesis and crystal structure of a new pentanuclear heterotrimetallic Cu/Co/Ni complex with 2-(dimethylamino)ethanol. Discussion of possible “butterfly-like” molecular structure types
Source: Royal Society of Chemistry journal article supplement (doi:10.1039/c1ce05049d), 2011-01-01
Supplement: c1ce05049d.pdf [file c1ce05049d.pdf]

## Electronic Supplementary Information

# **Direct Synthesis and Crystal Structure of a New Pentanuclear Heterotrimetallic Cu/Co/Ni Complex with 2-(dimethylamino)ethanol. Discussion of Possible “Butterfly-Like” Molecular Structure Types**

*Dmytro S. Nesterov,<sup>a</sup> Claudia Graiff,<sup>b</sup> Antonio Tiripicchio<sup>b</sup> and Armando J. L. Pombeiro<sup>\*a</sup>*

<sup>a</sup> *Centro de Química Estrutural, Complexo I, Instituto Superior Técnico, TU Lisbon, Av. Rovisco Pais, 1049-001, Lisbon, Portugal. Fax: +351 218464455; E-mail: pombeiro@ist.utl.pt*

<sup>b</sup> *Dipartimento di Chimica Generale e Inorganica, Chimica Analitica, Chimica Fisica, Università di Parma, Viale G. P. Usberti 17/A, I-43100 Parma, Italy.*

**Table S1.** A complete list of Cambridge Structural Database refcodes for the structures of the respective Molecular Structure Types.

| <i>a</i> | <i>b</i> | <i>c</i> | <i>d</i> | <i>e</i> | <i>f</i> | <i>g</i> | <i>h</i> | <i>i</i> | <i>j</i> | <i>k</i> | <i>l</i> | <i>m(a)</i> | <i>m(b)</i> | <i>m(c)</i> |
|----------|----------|----------|----------|----------|----------|----------|----------|----------|----------|----------|----------|-------------|-------------|-------------|
| KENYUX   | KIGJQZ   | QOVKUI   | ETCBIA   | IGEHIL   | BEPFIL   | BAJVEO   | CAJMOP   | CEBKAV   | ATEWEB   | CISFUG   | AWEWII   | AJACYI      | GAFHEB      | FEWNOL      |
| KENZA E  |          | KODJIW   | ETCBIB   | SIPHUU   | VAQXUH   | DEXGUJ   | CATRUL   | CEBKAV10 | GENSIB   | CUGVOP   | CIKPOS   | AJACUK      | GAFHIF      | WIGQOS      |
| TAXNUC   |          | NAZRIQ   | ETCBIC   |          | WIRCAB   | ELELOW   | CATSAS   | COGCEG   | HIBKOS   | FIMHEP   | CIKPOS10 | CALDID      | ICOYOP      |             |
| TAXPAK   |          |          |          |          |          | MIBXIE   | CATSEW   | COSWAI   | LAHVEV   | FIMHOZ   | FOJPAW   | EBOVOG      | ICOZAC      |             |
| VETTAQ   |          |          |          |          |          |          | CATSUM   | DIRVEF   | POMBIC   | GOTFEA   | KABFOI   | EBOVUM      | ICOZEG      |             |
| WAHQOM   |          |          |          |          |          |          | CENRUI   | DIRVIJ   | POMBIC10 | GOTFIE   | LIZHUX   | EDAKID      | ICOZIK      |             |
| XAZVEA   |          |          |          |          |          |          | CENTEU   |          | POMBOI   | IBEMUX   | LIZJAF   | EGJIEJ      | ICOZUW      |             |
| XAZVIE   |          |          |          |          |          |          | CENTY    |          | POMBOI10 | LEBQUE   | MOMJUT   | GEWVIN      | JALWEY      |             |
|          |          |          |          |          |          |          | CENWEX   |          | REYSET   | LEBQUE   | PIFGUG   | GEWIN10     | JAMGAG      |             |
|          |          |          |          |          |          |          | DUFQUQ   |          | SOLFUU   | LOLNIJ   | PIFGUG10 | HOPJAX      | JAMGEK      |             |
|          |          |          |          |          |          |          | FAQROF   |          | VUHHUB   | RODMAY   | PIFHER   | HOPJAX01    | JAMGIP      |             |
|          |          |          |          |          |          |          | HOOKUT   |          | YOCBUN   | THMOFE   | PIFHER10 | MAQKEU      | OHESEZ      |             |
|          |          |          |          |          |          |          | IQUWOG   |          |          |          | PIFHIV   | MARXOT      | OIBHAL      |             |
|          |          |          |          |          |          |          | NILDER   |          |          |          | PIFHIV10 | MODJOE      | QEFMAP      |             |
|          |          |          |          |          |          |          | SOLYUN   |          |          |          | PIFHOB   | MODJUK      | QEFMAP01    |             |
|          |          |          |          |          |          |          | SOLZAU   |          |          |          | PIFHOB10 | RUGTAO      | RASCAP      |             |
|          |          |          |          |          |          |          | SOLZEY   |          |          |          | PIVQAM   | SAJBOU      | RASCET      |             |
|          |          |          |          |          |          |          | TOJMEK   |          |          |          | QALXOR   | VEZPUL      | UDOTAI      |             |
|          |          |          |          |          |          |          | VOVXIN   |          |          |          | QALXUX   | VICFES      | YISWED      |             |
|          |          |          |          |          |          |          |          |          |          |          | QEFJOA   | VUHHIP      |             |             |
|          |          |          |          |          |          |          |          |          |          |          | QEFJUG   | XADLUJ      |             |             |
|          |          |          |          |          |          |          |          |          |          |          | QIWQIW   | YARJAC      |             |             |
|          |          |          |          |          |          |          |          |          |          |          | QIWQIW01 | YEQLUO      |             |             |
|          |          |          |          |          |          |          |          |          |          |          | QIWQOC   | YEQYAV      |             |             |
|          |          |          |          |          |          |          |          |          |          |          | QIWQOC01 | YEQYEZ      |             |             |
|          |          |          |          |          |          |          |          |          |          |          | QIWQUI   | YUKTON      |             |             |
|          |          |          |          |          |          |          |          |          |          |          | QIWQUI01 |             |             |             |
|          |          |          |          |          |          |          |          |          |          |          | SORLAM   |             |             |             |
|          |          |          |          |          |          |          |          |          |          |          | SORLAM01 |             |             |             |
|          |          |          |          |          |          |          |          |          |          |          | SORLIU   |             |             |             |
|          |          |          |          |          |          |          |          |          |          |          | SORLIU01 |             |             |             |
|          |          |          |          |          |          |          |          |          |          |          | TETGUV   |             |             |             |
|          |          |          |          |          |          |          |          |          |          |          | TUGFEG   |             |             |             |
|          |          |          |          |          |          |          |          |          |          |          | VAXTOD   |             |             |             |
|          |          |          |          |          |          |          |          |          |          |          | VUSDAO   |             |             |             |
|          |          |          |          |          |          |          |          |          |          |          | WAFSIP   |             |             |             |
|          |          |          |          |          |          |          |          |          |          |          | WAFSIP01 |             |             |             |
|          |          |          |          |          |          |          |          |          |          |          | XACHAK   |             |             |             |
|          |          |          |          |          |          |          |          |          |          |          | XACHEO   |             |             |             |
|          |          |          |          |          |          |          |          |          |          |          | YOWCOC   |             |             |             |
